# Supplementary material for: Diminished PLK2 Induces Cardiac Fibrosis and Promotes Atrial Fibrillation
Source: PubMed Central journal article supplement — Circ Res. 2021 Aug 26;129(8):804–20. doi: 10.1161/CIRCRESAHA.121.319425 (PMC8487716; doi:10.1161/circresaha.121.319425), 2021-08-26

# Full unedited gel for Figure 1 a

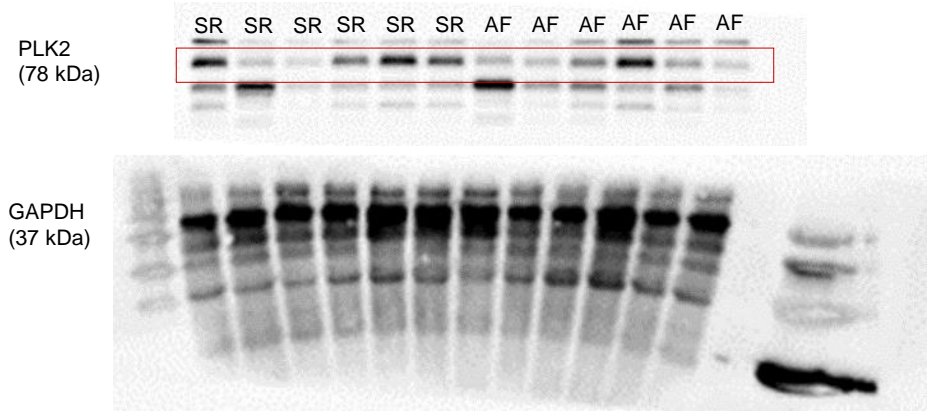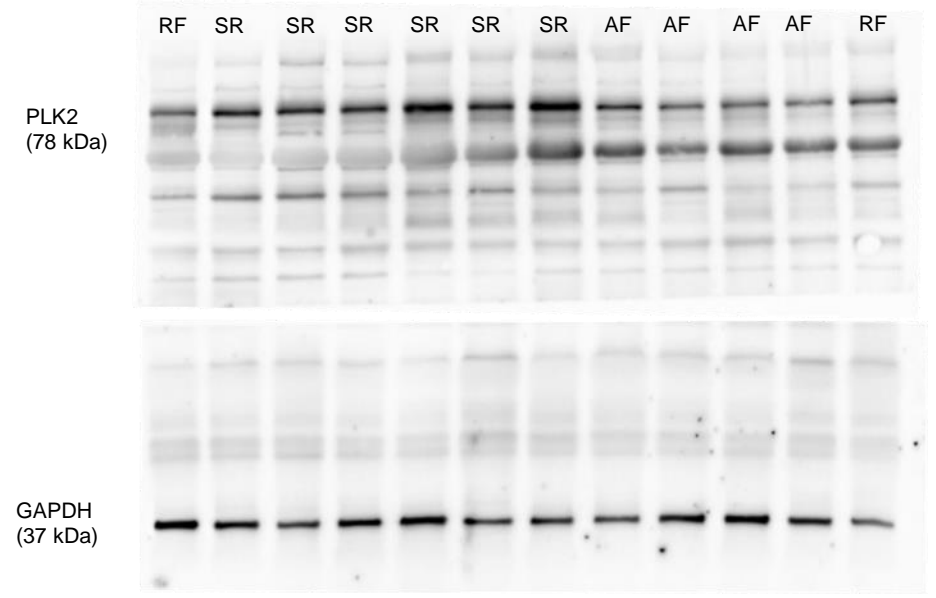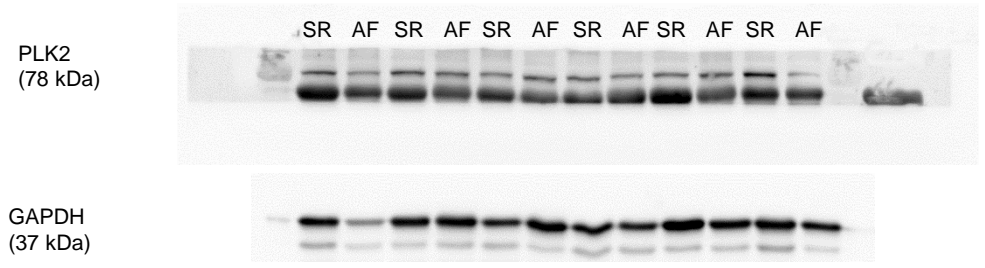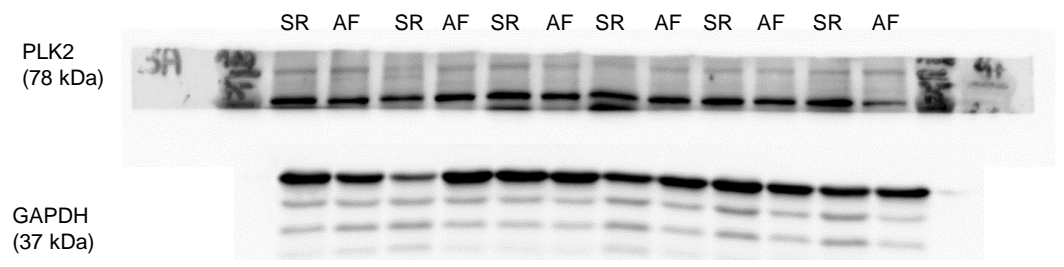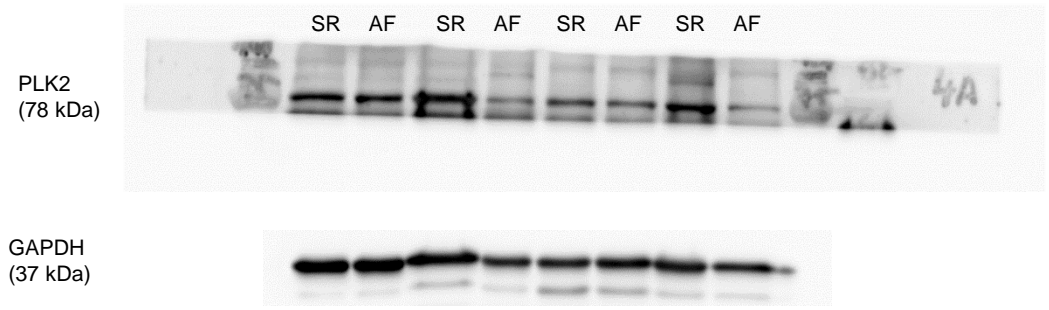

Full unedited gel for Figure 1 f

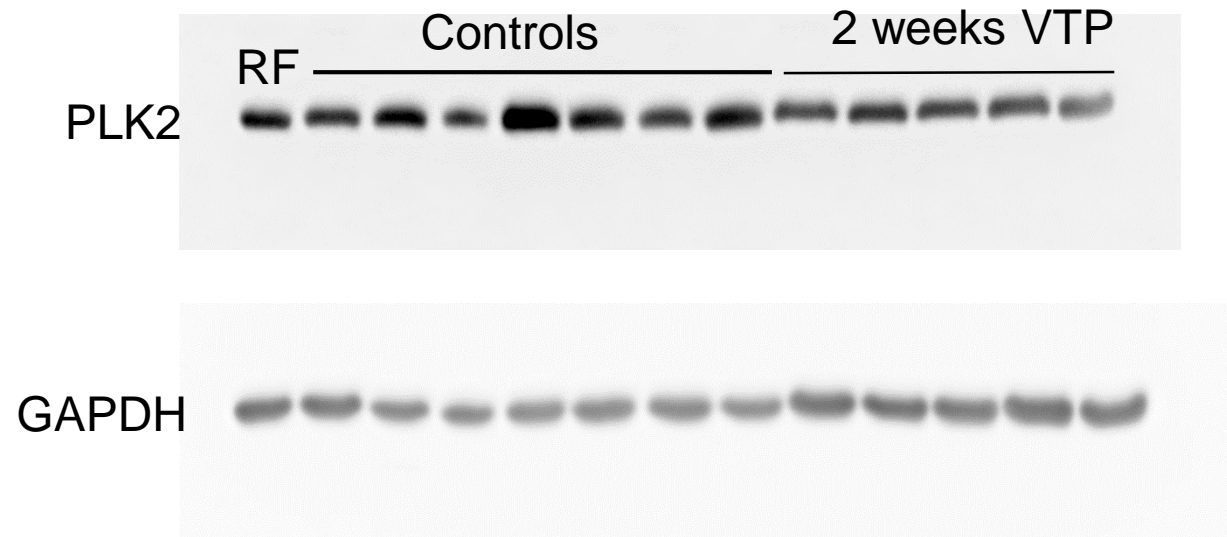

Full unedited gel for Figures 1 c and e

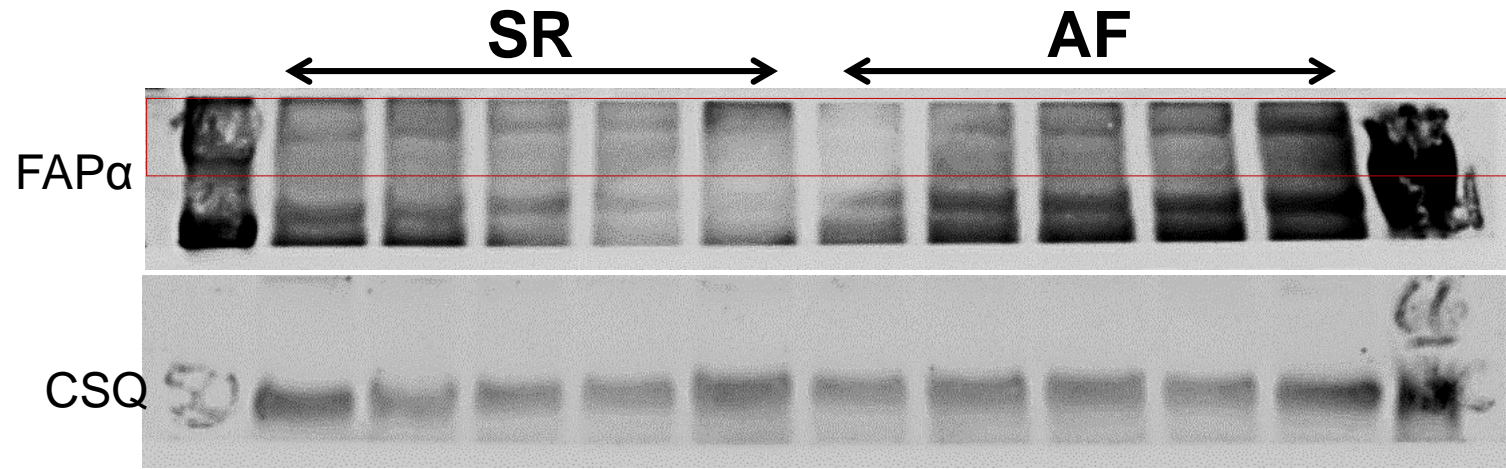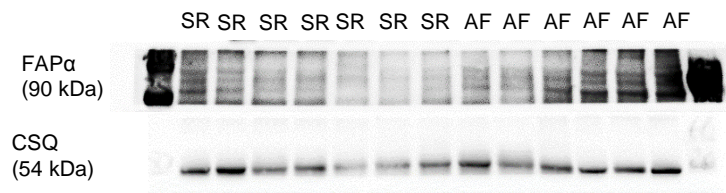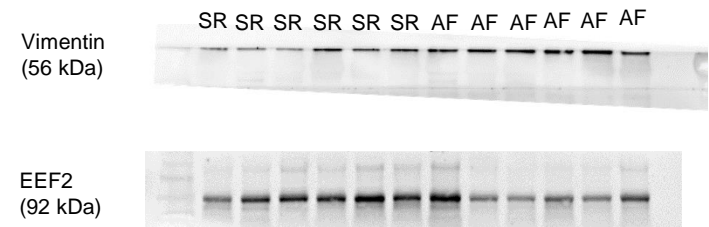

Full unedited gel for Figures 1 d

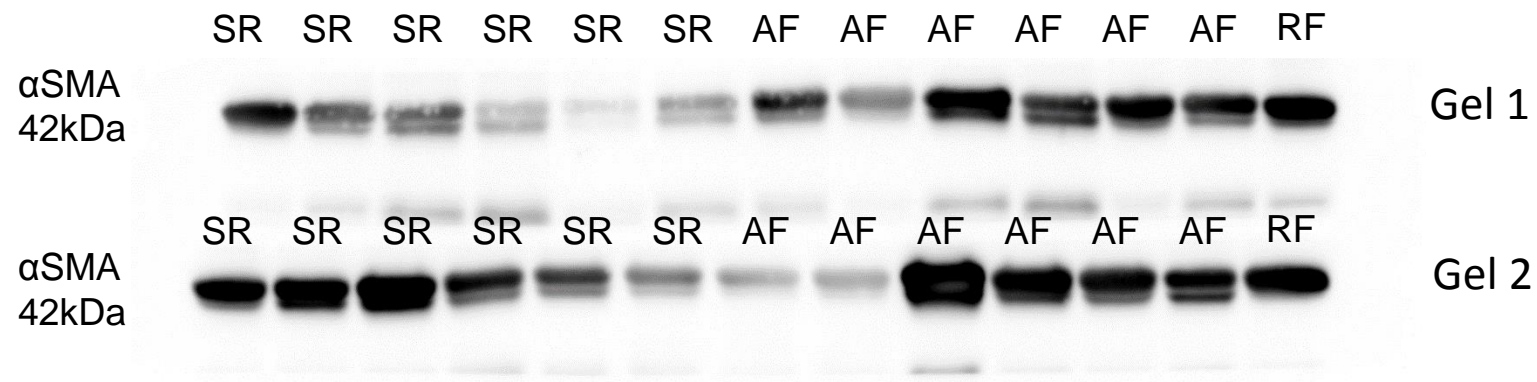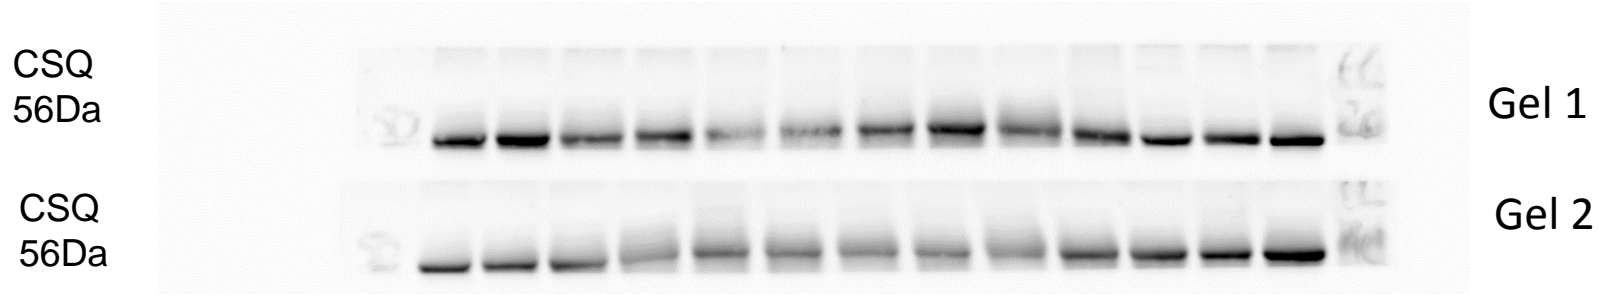

Full unedited gel for Figure 2 a) Methylation-specific PCR SR vs. AF patients

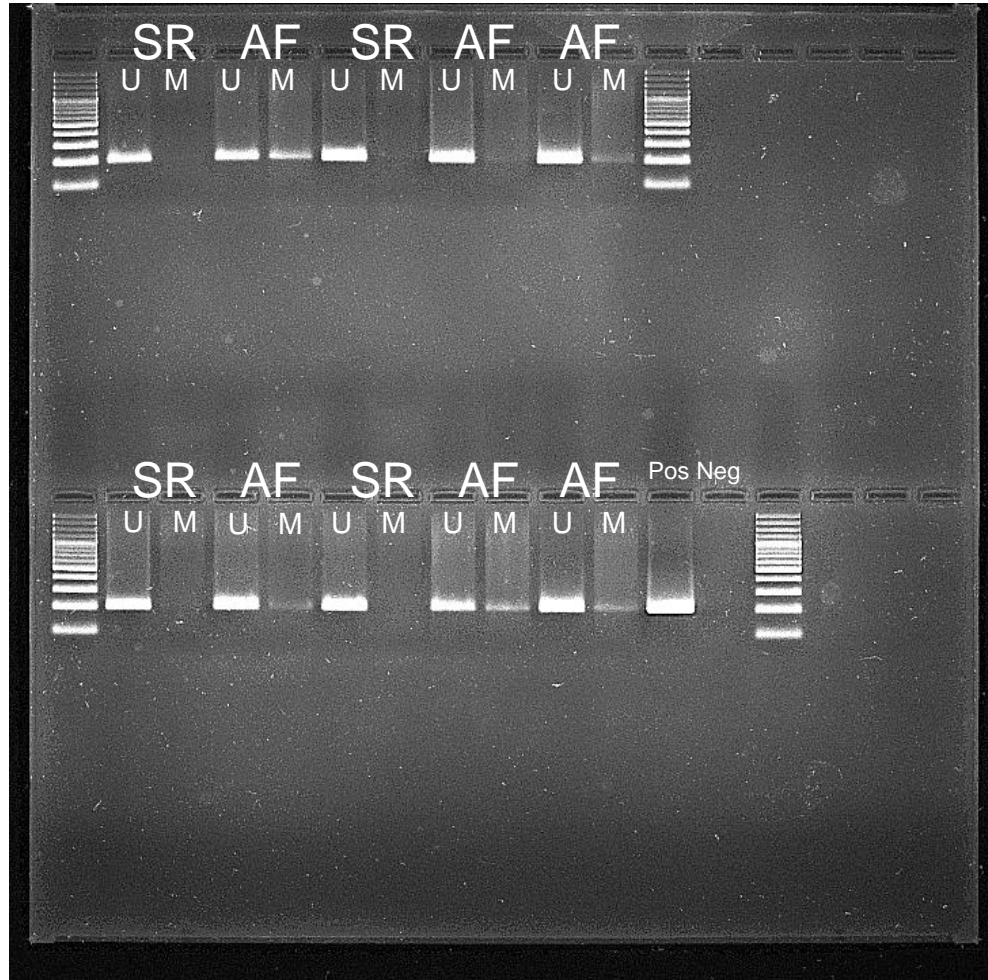

Full unedited gel for Figure 2c) Methylation-specific PCR 24 h of 1% O<sub>2</sub> hypoxia

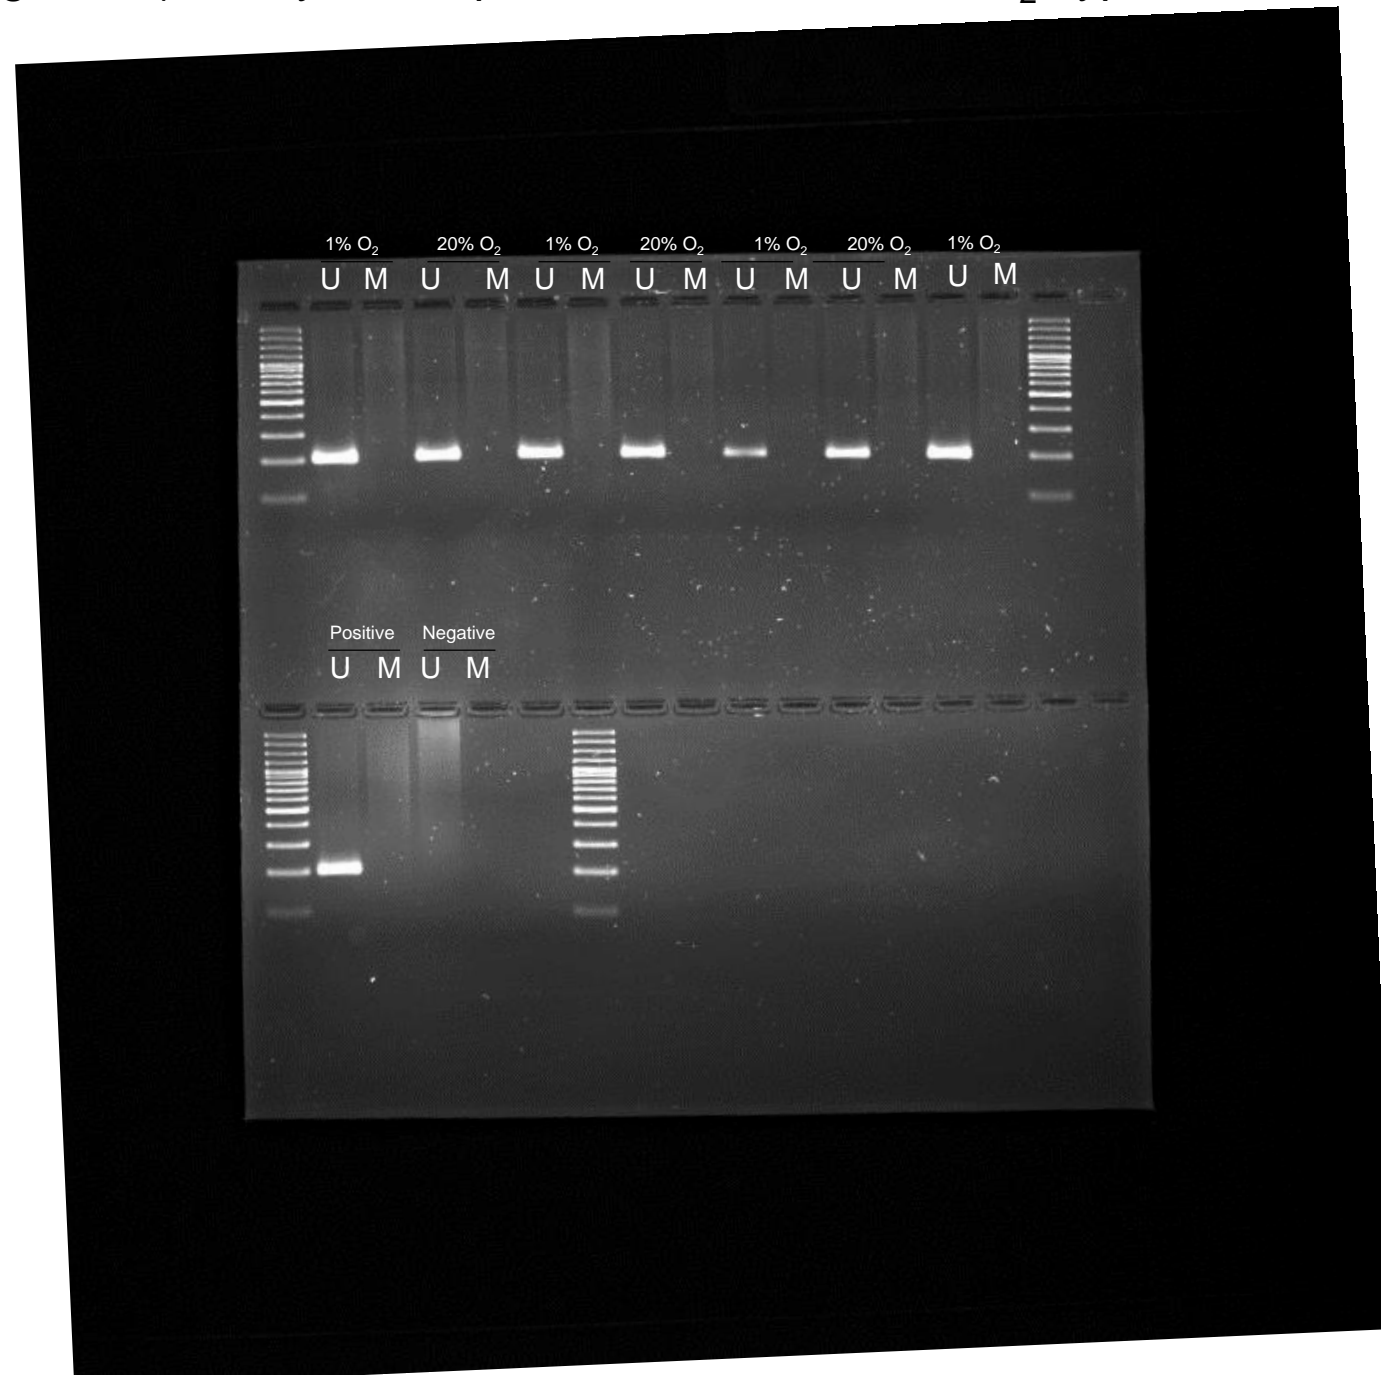

Full unedited gel for Figure 2c) Methylation-specific PCR 96 h of 1% O<sub>2</sub> hypoxia

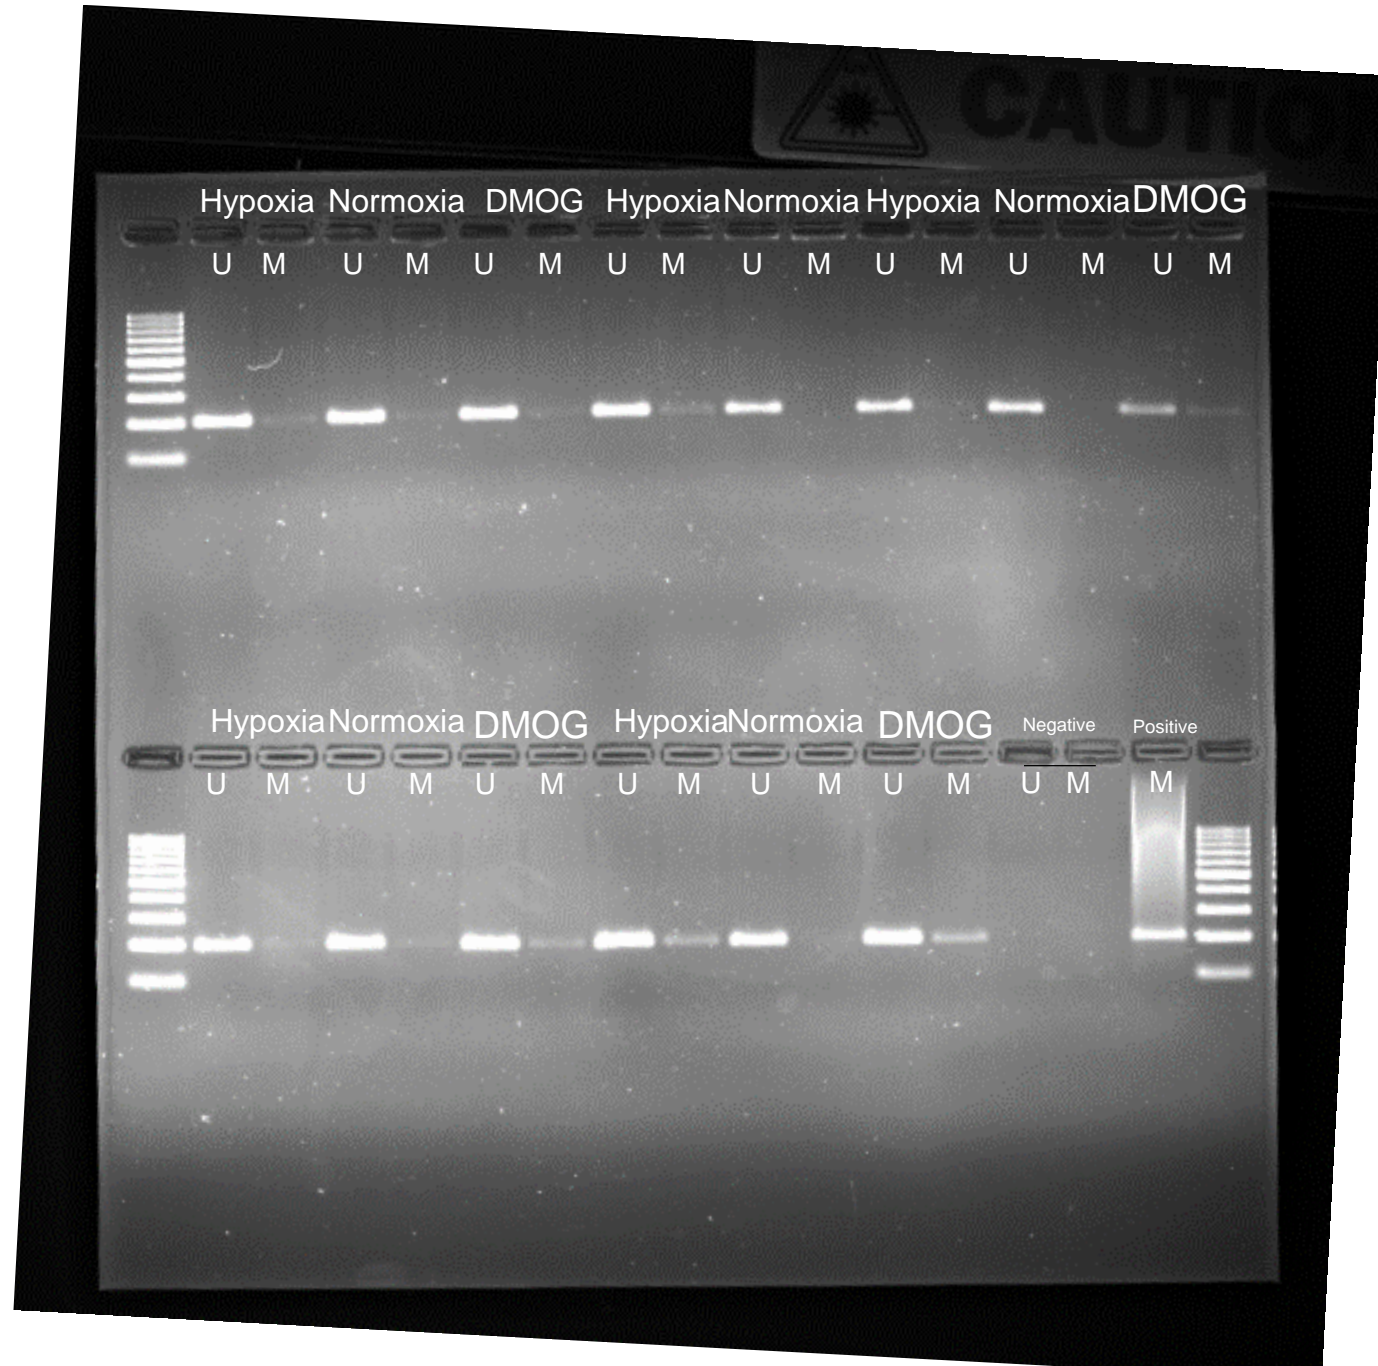

Full unedited gel for Figures 2 d, e

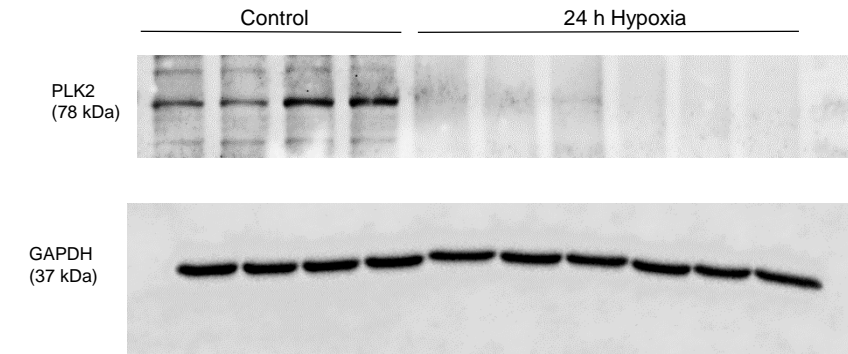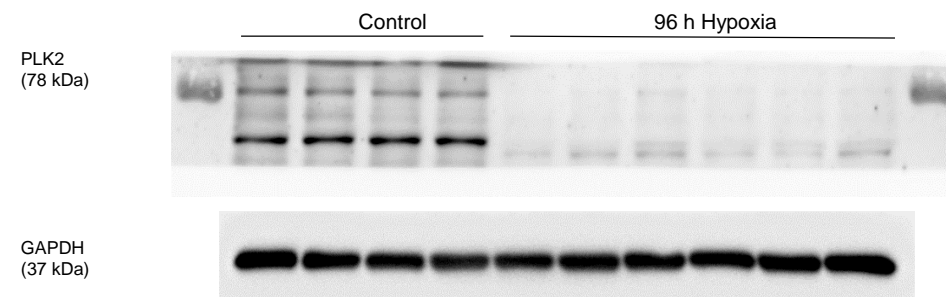



Full unedited gel for Figure 4 b and c

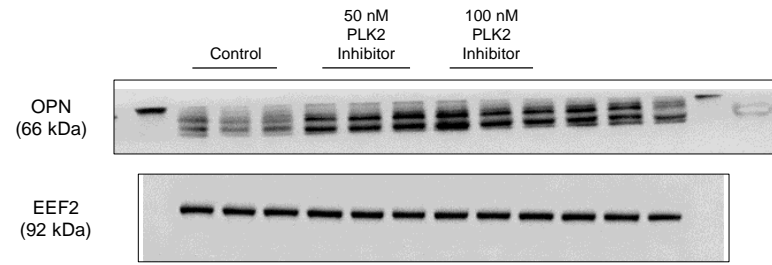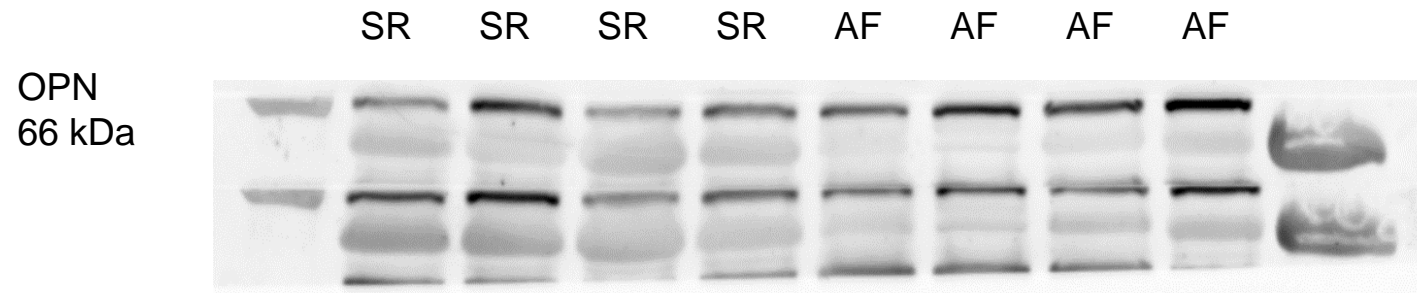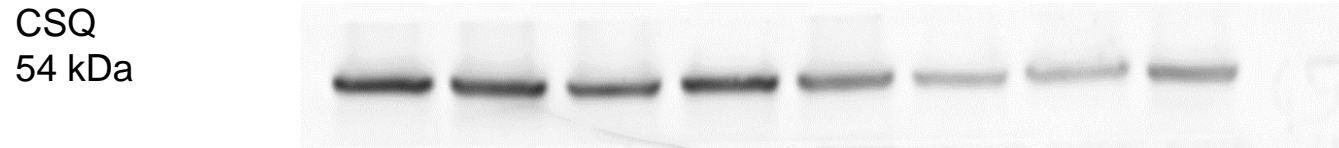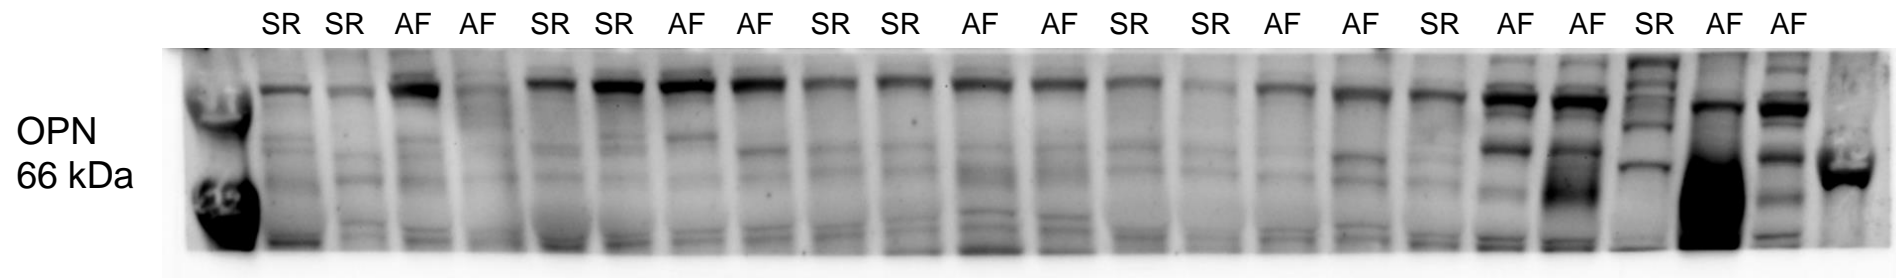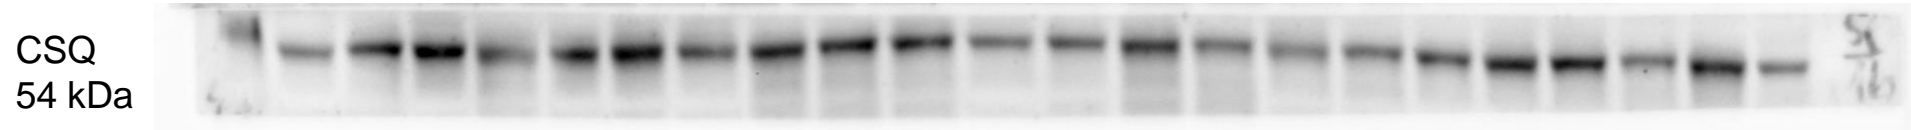

Full unedited gel for Figure 4 e and f

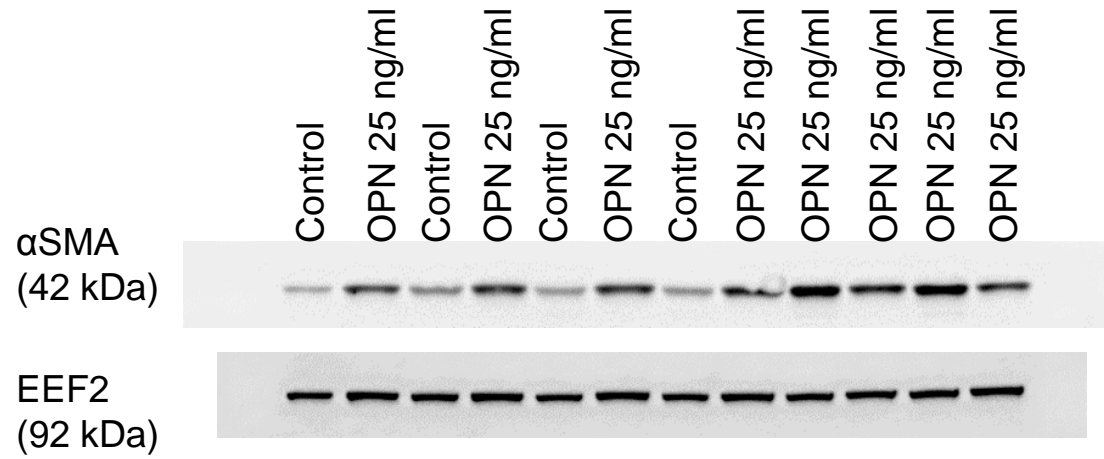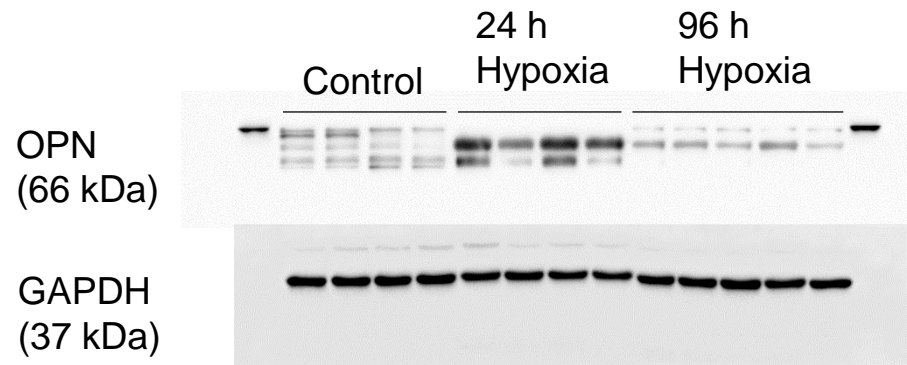

Full unedited gel for Figure 5 a, b, c

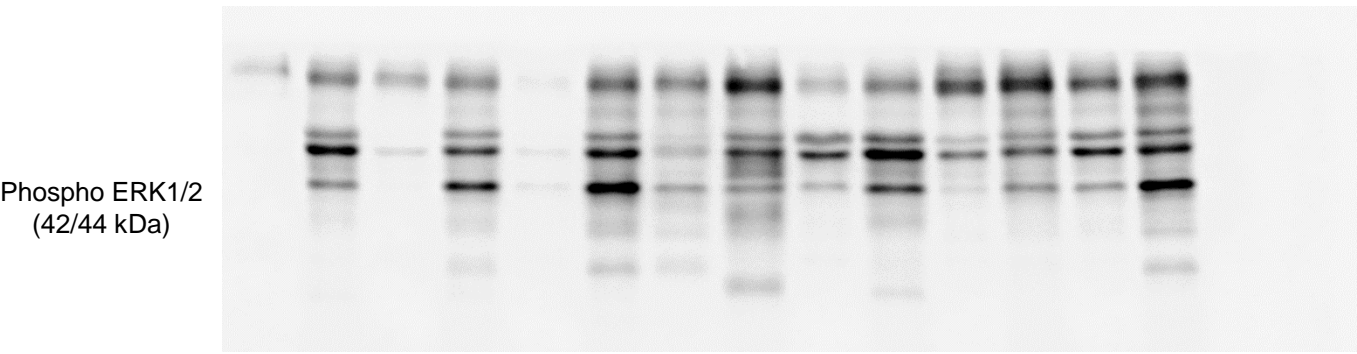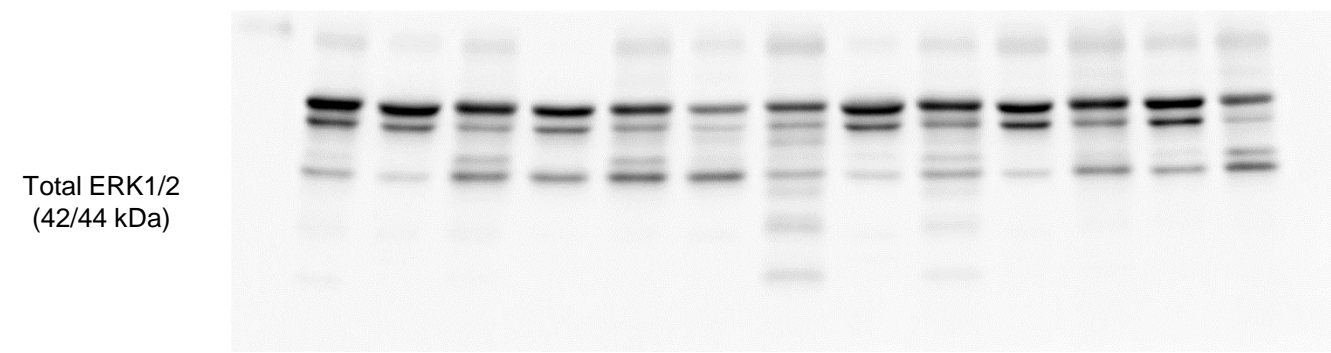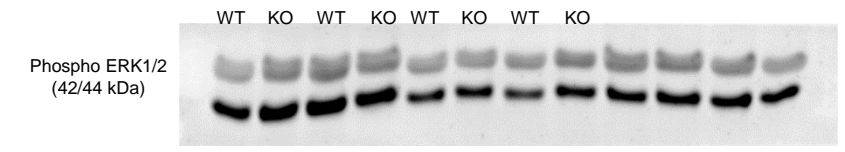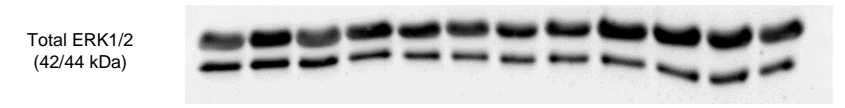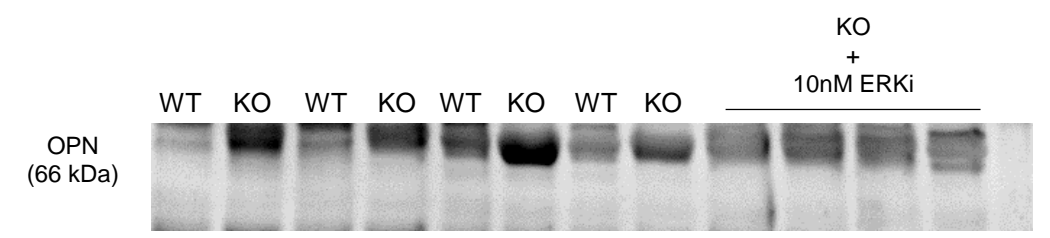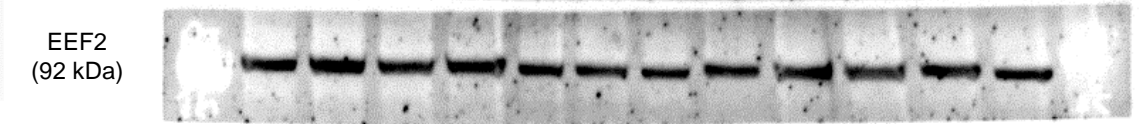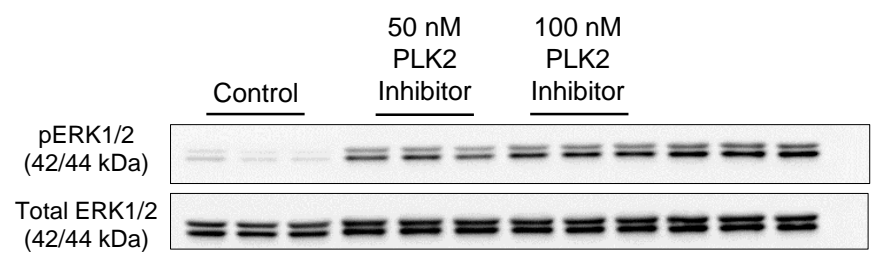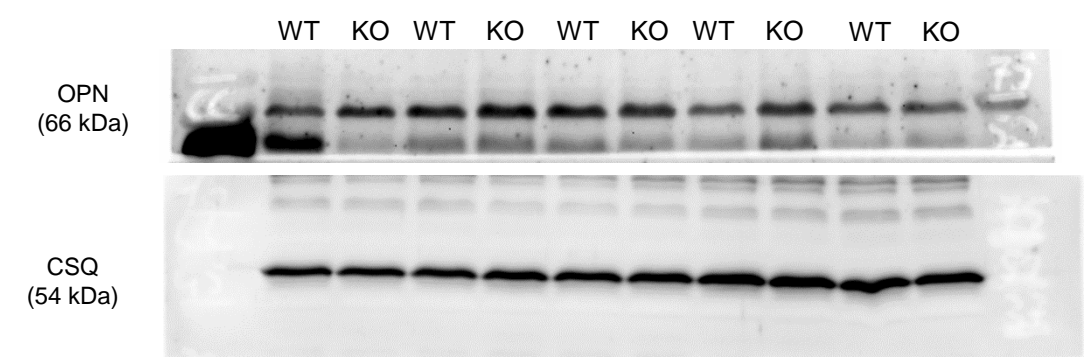

Full unedited gel for Supplement Figure 2

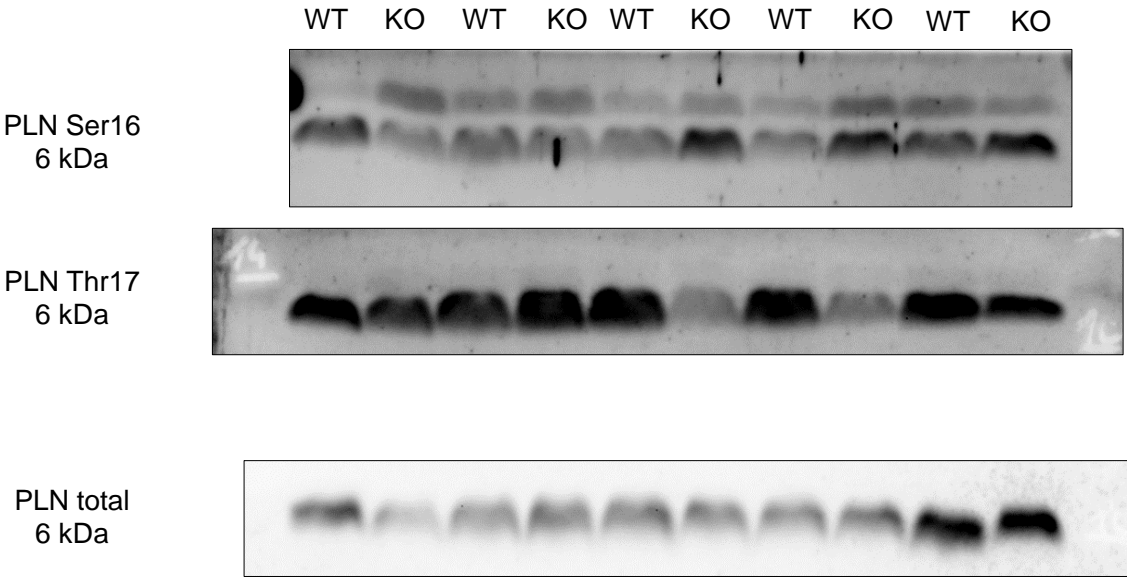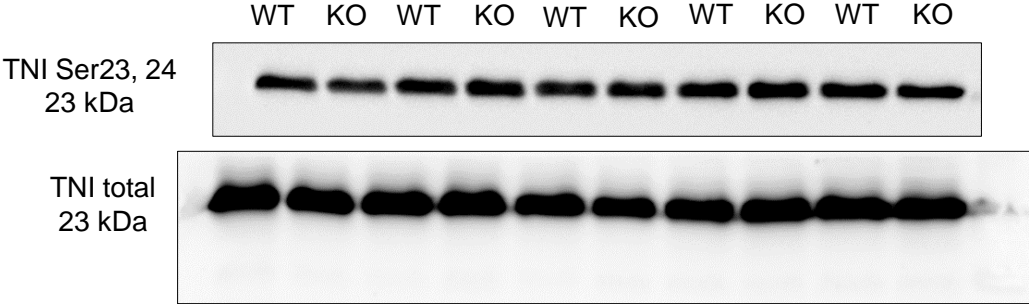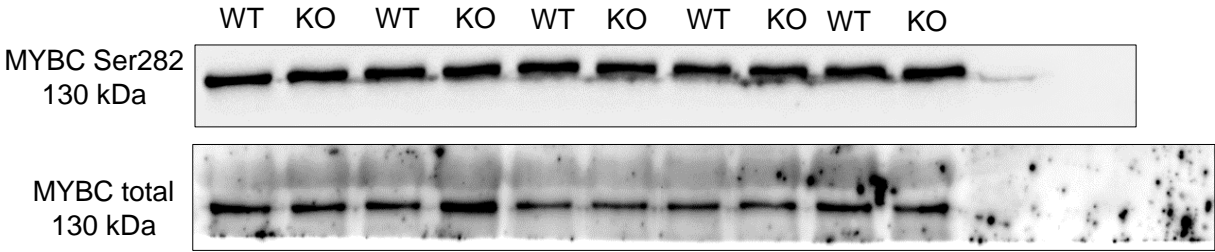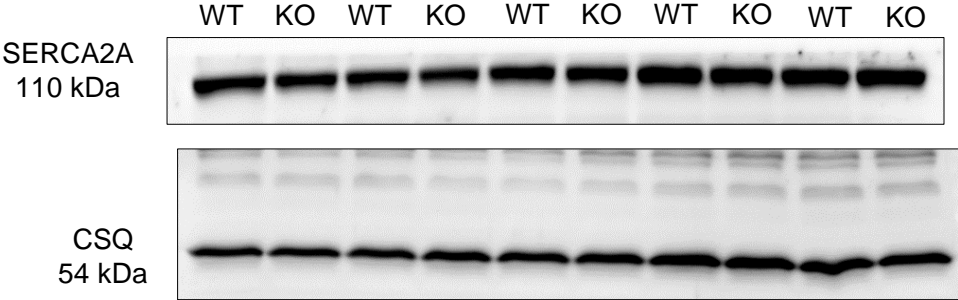

Supplement: res-129-804-s002.pdf [file res-129-804-s002.pdf]
