# Supplementary material for: Diminished PLK2 Induces Cardiac Fibrosis and Promotes Atrial Fibrillation
Source: PubMed Central journal article supplement — Circ Res. 2021 Aug 26;129(8):804–20. doi: 10.1161/CIRCRESAHA.121.319425 (PMC8487716; doi:10.1161/circresaha.121.319425), 2021-08-26
Supplement: res-129-804-s003.pdf [file res-129-804-s003.pdf]

## Major Resources Table

In order to allow validation and replication of experiments, all essential research materials listed in the Methods should be included in the Major Resources Table below. Authors are encouraged to use public repositories for protocols, data, code, and other materials and provide persistent identifiers and/or links to repositories when available. Authors may add or delete rows as needed.

### Animals (in vivo studies)

| Species      | Vendor or Source | Background Strain | Sex | Persistent ID / URL                                                                                                                           |
|--------------|------------------|-------------------|-----|-----------------------------------------------------------------------------------------------------------------------------------------------|
| Mus musculus | Janvier Labs     | C57BL/6J          | M   | <a href="https://www.janvier-labs.com/en/fiche_produit/c57bl-6nrj_mouse/">https://www.janvier-labs.com/en/fiche_produit/c57bl-6nrj_mouse/</a> |
|              |                  |                   |     |                                                                                                                                               |
|              |                  |                   |     |                                                                                                                                               |

### Genetically Modified Animals

|                 | Species             | Vendor or Source       | Background Strain | Other Information                                                   | Persistent ID / URL |
|-----------------|---------------------|------------------------|-------------------|---------------------------------------------------------------------|---------------------|
| Parent - Male   | <i>Mus musculus</i> | The Jackson Laboratory | C57BL/6NTac       | Plk2 knock-out<br>129S.B6N-<br>Plk2 <sup>tm1Ela<sup>n</sup>/J</sup> | JAX stock #017001   |
| Parent - Female | <i>Mus musculus</i> | The Jackson Laboratory | C57BL/6NTac       | Plk2 knock-out<br>129S.B6N-<br>Plk2 <sup>tm1Ela<sup>n</sup>/J</sup> | JAX stock #017001   |

### Antibodies

| Target antigen                 | Vendor or Source | Catalog # | Working concentration          | Lot # (preferred but not required) | Persistent ID / URL                                                                                                                                                                                                                       |
|--------------------------------|------------------|-----------|--------------------------------|------------------------------------|-------------------------------------------------------------------------------------------------------------------------------------------------------------------------------------------------------------------------------------------|
| GAPDH                          | Santa-Cruz       | sc-365062 | 1 : 1000                       |                                    | <a href="https://www.scbt.com/de/p/gapdh-antibody-g-9">https://www.scbt.com/de/p/gapdh-antibody-g-9</a>                                                                                                                                   |
| EEF2                           | Abcam            | ab40812   | 1 : 50.000                     |                                    | <a href="https://www.abcam.com/eef2elongation-factor-2-antibody-ab40812.html">https://www.abcam.com/eef2elongation-factor-2-antibody-ab40812.html</a>                                                                                     |
| CSQ                            | Abcam            | ab3516    | 1 : 1.000                      |                                    | <a href="https://www.abcam.com/calsequestrin-antibody-ab3516.html">https://www.abcam.com/calsequestrin-antibody-ab3516.html</a>                                                                                                           |
| PLK2                           | Cell Signaling   | #14812    | 1 : 1.000                      |                                    | <a href="https://www.cellsignal.com/products/primary-antibodies/plk2-d5r2b-rabbit-mab/14812?Ntk=Products&amp;Ntt=14812">https://www.cellsignal.com/products/primary-antibodies/plk2-d5r2b-rabbit-mab/14812?Ntk=Products&amp;Ntt=14812</a> |
| αSMA                           | Sigma-Aldrich    | A5228     | 1 : 1.000 (WB)<br>1: 200 (ICC) |                                    | <a href="https://www.sigmaaldrich.com/catalog/product/sigma/a5228">https://www.sigmaaldrich.com/catalog/product/sigma/a5228</a>                                                                                                           |
| ERK1/2                         | Cell Signaling   | 9102      | 1 : 1.000                      |                                    | <a href="https://www.cellsignal.com/products/primary-antibodies/p44-42-mapk-erk1-2-antibody/9102">https://www.cellsignal.com/products/primary-antibodies/p44-42-mapk-erk1-2-antibody/9102</a>                                             |
| Phospho-ERK1/2 (Thr202/Tyr204) | Cell Signaling   | 9101      | 1 : 1.000                      |                                    | <a href="https://www.cellsignal.com/products/primary-antibodies/phospho-p44-42-mapk-erk1-2-thr202-tyr204-antibody/9101">https://www.cellsignal.com/products/primary-antibodies/phospho-p44-42-mapk-erk1-2-thr202-tyr204-antibody/9101</a> |
| OPN                            | Abcam            | ab8448    | 1 : 1.000                      |                                    | <a href="https://www.abcam.com/osteopontin-antibody-ab8448.html">https://www.abcam.com/osteopontin-antibody-ab8448.html</a>                                                                                                               |
| FAPα                           | Abcam            | ab53066   | 1 : 1.000                      |                                    | <a href="https://www.abcam.com/fibroblast-activation-protein-alpha-antibody-ab53066.html">https://www.abcam.com/fibroblast-activation-protein-alpha-antibody-ab53066.html</a>                                                             |

|                                    |                         |             |            |  |                                                                                                                                     |
|------------------------------------|-------------------------|-------------|------------|--|-------------------------------------------------------------------------------------------------------------------------------------|
| Vimentin                           | Abcam                   | ab137321    | 1 : 1.000  |  | <a href="https://www.abcam.com/vimentin-antibody-ab137321.html">https://www.abcam.com/vimentin-antibody-ab137321.html</a>           |
| Collagen 1                         | Abcam                   | ab34710     | 1 : 200    |  | <a href="https://www.abcam.com/collagen-i-antibody-ab34710.html">https://www.abcam.com/collagen-i-antibody-ab34710.html</a>         |
| Goat anti-mouse                    | Sigma-Aldrich           | A3682       | 1 : 10:000 |  | <a href="https://www.sigmaaldrich.com/catalog/product/sigma/a3682">https://www.sigmaaldrich.com/catalog/product/sigma/a3682</a>     |
| Goat anti-rabbit                   | Jackson Immuno Research | 111-035-045 | 1 : 10.000 |  | <a href="https://www.jacksonimmuno.com/catalog/products/111-035-045">https://www.jacksonimmuno.com/catalog/products/111-035-045</a> |
| Alexa fluor 546 (goat-anti-mouse)  | Thermo Fisher           | Z25004      | 1 : 400    |  | <a href="https://www.thermofisher.com/order/catalog/product/Z25000">https://www.thermofisher.com/order/catalog/product/Z25000</a>   |
| Alexa fluor 546 (goat-anti-rabbit) | Thermo Fisher           | Z25304      | 1 : 400    |  | <a href="https://www.thermofisher.com/order/catalog/product/Z25304">https://www.thermofisher.com/order/catalog/product/Z25304</a>   |

### RT-qPCR Primers

| Species             | Target | Fwd | Rev | Supplier               |
|---------------------|--------|-----|-----|------------------------|
| Homo sapiens        | PLK2   | N/A | N/A | qHsaCED0045278; BioRad |
|                     | DNMT1  | N/A | N/A | qHsaCED0044343; BioRad |
|                     | DNMT3a | N/A | N/A | qHsaCID0010863; BioRad |
| <i>Mus musculus</i> | OPN    | N/A | N/A | qMmuCED0040763; BioRad |

### DNA/cDNA Clones: N/A

| Clone Name | Sequence | Source / Repository | Persistent ID / URL |
|------------|----------|---------------------|---------------------|
|            |          |                     |                     |

### Cultured Cells

| Name                              | Vendor or Source                                                                                                                  | Sex (F, M, or unknown) | Persistent ID / URL |
|-----------------------------------|-----------------------------------------------------------------------------------------------------------------------------------|------------------------|---------------------|
| Human Atrial Fibroblast HAF-SRK01 | Developed in-house as described:<br><a href="https://doi.org/10.1002/2211-5463.12896">https://doi.org/10.1002/2211-5463.12896</a> | Male, 83Y              | RRID: CVCL_ZG36     |

### Data & Code Availability: N/A

| Description | Source / Repository | Persistent ID / URL |
|-------------|---------------------|---------------------|
|             |                     |                     |

### Other

| Description                    | Source / Repository | Persistent ID / URL                                                                                                                                   |
|--------------------------------|---------------------|-------------------------------------------------------------------------------------------------------------------------------------------------------|
| EZ DNA Methylation Startup Kit | Zymo Research       | <a href="https://www.zymoresearch.de/products/ez-dna-methylation-startup-kit">https://www.zymoresearch.de/products/ez-dna-methylation-startup-kit</a> |

DOI [to be added]

|                                            |                         |                                                                                                                                                                                                                                                                                                                                                                                                                                                               |
|--------------------------------------------|-------------------------|---------------------------------------------------------------------------------------------------------------------------------------------------------------------------------------------------------------------------------------------------------------------------------------------------------------------------------------------------------------------------------------------------------------------------------------------------------------|
| Histology: Sirius red (Direct Red 80)      | Sigma-Aldrich           | <a href="https://www.sigmaaldrich.com/DE/en/product/sial/365548?context=product">https://www.sigmaaldrich.com/DE/en/product/sial/365548?context=product</a>                                                                                                                                                                                                                                                                                                   |
| HRP substrates: West Dura/West Femto       | Thermo Fisher           | <a href="https://www.thermofisher.com/de/de/home/life-science/protein-biology/protein-assays-analysis/western-blotting/detect-proteins-western-blot/western-blot-detection-reagents/chemiluminescent-western-blot-detection.html">https://www.thermofisher.com/de/de/home/life-science/protein-biology/protein-assays-analysis/western-blotting/detect-proteins-western-blot/western-blot-detection-reagents/chemiluminescent-western-blot-detection.html</a> |
| Human Osteopontin ELISA Kit                | Abcam, ab100618         | <a href="https://www.abcam.com/human-osteopontin-elisa-kit-ab100618.html">https://www.abcam.com/human-osteopontin-elisa-kit-ab100618.html</a>                                                                                                                                                                                                                                                                                                                 |
| Pierce™ BCA Protein Assay Kit              | Thermo Fisher           | <a href="https://www.thermofisher.com/order/catalog/product/23225">https://www.thermofisher.com/order/catalog/product/23225</a>                                                                                                                                                                                                                                                                                                                               |
| PureLink Genomic DNA Extraction kit        | Invitrogen ThermoFisher | <a href="https://www.thermofisher.com/order/catalog/product/K182002">https://www.thermofisher.com/order/catalog/product/K182002</a>                                                                                                                                                                                                                                                                                                                           |
| RNeasy Mini Kit                            | Qiagen                  | <a href="https://www.qiagen.com/de/products/discovery-and-translational-research/dna-rna-purification/rna-purification/total-rna/rneasy-mini-kit/">https://www.qiagen.com/de/products/discovery-and-translational-research/dna-rna-purification/rna-purification/total-rna/rneasy-mini-kit/</a>                                                                                                                                                               |
| SsoAdvanced Universal SYBR® Green Supermix | Bio-Rad                 | <a href="https://www.bio-rad.com/de-de/sku/1725274-ssoadvanced-universal-sybr-green-supermix-2500-x-20-ul-rxns-25-ml-5-x-5-ml?ID=1725274">https://www.bio-rad.com/de-de/sku/1725274-ssoadvanced-universal-sybr-green-supermix-2500-x-20-ul-rxns-25-ml-5-x-5-ml?ID=1725274</a>                                                                                                                                                                                 |
